# Supplementary material
Source: PubMed Central journal article supplement (PMC3375357)
Supplement: NIHMS357670-supplement-supplement_1.pdf [file NIHMS357670-supplement-supplement_1.pdf]

| Reported PsO / PsA Association | HLA Allele          | HERV SNP (Major Allele/Minor Allele: Risk Allele) |                      |                      |                      |                      |
|--------------------------------|---------------------|---------------------------------------------------|----------------------|----------------------|----------------------|----------------------|
|                                |                     | rs114780460 (G/A:G)                               | rs3134774 (A/G:G)    | rs9264082 (A/G:A)    | rs3132531 (G/A:A)    | rs3134775 (T/G:G)    |
| <b>Risk</b>                    | B*27 ( $r^2$ )      | <b>0.07</b>                                       | <b>0</b>             | <b>0.05</b>          | <b>0.03</b>          | <b>0</b>             |
|                                | B*27 (D')           | 0.35                                              | 0.11                 | 0.38                 | 0.82                 | 0.1                  |
|                                | B*27 (+) Haplotypes | (+)G=3.4; (+)A=2.5                                | (+)G=3.1; (+)A=2.8   | (+)G=2.8; (+)A=3.1   | (+)G=5.3; (+)A=0.4   | (+)G=3.0; (+)T=2.8   |
|                                | B*27 (-) Haplotypes | (-)G=83.2; (-)A=10.5                              | (-)G=43.3; (-)A=50.8 | (-)G=12.4; (-)A=81.6 | (-)G=52.3; (-)A=42   | (-)G=43.5; (-)T=50.7 |
| <b>Risk</b>                    | B*38 ( $r^2$ )      | <b>0.01</b>                                       | <b>0.04</b>          | <b>0.01</b>          | <b>0.03</b>          | <b>0.05</b>          |
|                                | B*38 (D')           | 1                                                 | 0.86                 | 1                    | 0.7                  | 0.86                 |
|                                | B*38 (+) Haplotypes | (+)G=6.4; (+)A=0                                  | (+)G=0.4; (+)A=6.0   | (+)G=0; (+)A=6.4     | (+)G=5.6; (+)A=0.8   | (+)G=0.4; (+)T=6     |
|                                | B*38 (-) Haplotypes | (-)G=86.1; (-)A=8.0                               | (-)G=46; (-)A=47.7   | (-)G=15.2; (-)A=78.4 | (-)G=51.9; (-)A=41.7 | (-)G=46.1; (-)T=47.4 |
| <b>Risk</b>                    | B*39 ( $r^2$ )      | <b>0</b>                                          | <b>0.02</b>          | <b>0</b>             | <b>0.02</b>          | <b>0.03</b>          |
|                                | B*39 (D')           | 1                                                 | 1                    | 0.46                 | 1                    | 1                    |
|                                | B*39 (+) Haplotypes | (+)G=2.7; (+)A=0                                  | (+)G=0; (+)A=2.7     | (+)G=0.2; (+)A=2.5   | (+)G=2.7; (+)A=0     | (+)G=0; (+)T=2.8     |
|                                | B*39 (-) Haplotypes | (-)G=86.8; (-)A=10.5                              | (-)G=46.4; (-)A=50.9 | (-)G=15; (-)A=82.3   | (-)G=54.8; (-)A=42.5 | (-)G=46.5; (-)T=50.7 |
| <b>Protective</b>              | B*40 ( $r^2$ )      | <b>0</b>                                          | <b>0.02</b>          | <b>0</b>             | <b>0.03</b>          | <b>0.02</b>          |
|                                | B*40 (D')           | 0.25                                              | 0.79                 | 0.53                 | 1                    | 0.8                  |
|                                | B*40 (+) Haplotypes | (+)G=3.8; (+)A=0.3                                | (+)G=0.4; (+)A=3.7   | (+)G=0.3; (+)A=3.8   | (+)G=4.1; (+)A=0     | (+)G=0.4; (+)T=3.8   |
|                                | B*40 (-) Haplotypes | (-)G=85.8; (-)A=10.1                              | (-)G=46; (-)A=49.9   | (-)G=14.9; (-)A=81   | (-)G=53.4; (-)A=42.5 | (-)G=46.1; (-)T=49.7 |
| <b>Risk</b>                    | B*57 ( $r^2$ )      | <b>0.02</b>                                       | <b>0.16</b>          | <b>0.03</b>          | <b>0.19</b>          | <b>0.16</b>          |
|                                | B*57 (D')           | 1                                                 | 0.9                  | 1                    | 0.92                 | 0.9                  |
|                                | B*57 (+) Haplotypes | (+)G=14.3; (+)A=0                                 | (+)G=13.6; (+)A=0.8  | (+)G=0; (+)A=14.3    | (+)G=0.7; (+)A=13.7  | (+)G=13.5; (+)T=0.8  |
|                                | B*57 (-) Haplotypes | (-)G=75.2; (-)A=10.5                              | (-)G=32.8; (-)A=52.9 | (-)G=15.2; (-)A=70.5 | (-)G=56.8; (-)A=28.8 | (-)G=33; (-)T=52.7   |
| <b>Risk</b>                    | C*06 ( $r^2$ )      | <b>0.05</b>                                       | <b>0.4</b>           | <b>0.07</b>          | <b>0.46</b>          | <b>0.39</b>          |
|                                | C*06 (D')           | 1                                                 | 0.92                 | 1                    | 0.93                 | 0.92                 |
|                                | C*06 (+) Haplotypes | (+)G=29.2; (+)A=0                                 | (+)G=28; (+)A=1.2    | (+)G=0; (+)A=29.2    | (+)G=1.1; (+)A=15.1  | (+)G=27.9; (+)T=1.2  |
|                                | C*06 (-) Haplotypes | (-)G=60.6; (-)A=10.2                              | (-)G=18.8; (-)A=52   | (-)G=15; (-)A=55.8   | (-)G=55.8; (-)A=27.9 | (-)G=19.1; (-)T=51.8 |
| <b>Risk</b>                    | C*12 ( $r^2$ )      | <b>0.01</b>                                       | <b>0.08</b>          | <b>0.02</b>          | <b>0.05</b>          | <b>0.08</b>          |
|                                | C*12 (D')           | 1                                                 | 1                    | 1                    | 0.85                 | 1                    |
|                                | C*12 (+) Haplotypes | (+)G=8.6; (+)A=0                                  | (+)G=0; (+)A=8.6     | (+)G=0; (+)A=8.6     | (+)G=8; (+)A=0.6     | (+)G=0; (+)T=8.7     |
|                                | C*12 (-) Haplotypes | (-)G=81.3; (-)A=10.2                              | (-)G=46.8; (-)A=44.7 | (-)G=15; (-)A=76.4   | (-)G=48.9; (-)A=42.5 | (-)G=46.9; (-)T=44.4 |

**Table S1. Linkage disequilibrium between HERV-K dUTPase SNPs and HLA alleles previously reported to be associated with psoriasis or psoriatic arthritis.** For each pair of HLA and HERV alleles,  $r^2$  values, D' values, and haplotype frequencies are shown. C\*06 and B\*57 show moderate LD with the HERV SNPs (max  $r^2=0.46$  and  $0.19$ , respectively), and thus are adjusted for in the association analysis of HERV SNPs with psoriasis. The other HLA alleles show lower LD with HERV SNPs (all  $r^2<0.09$ ) and are unlikely to serve as confounders. Although in some instances D' is close to or equal to 1 for B\*27, B\*38, B\*39, B\*40, and C\*12 (meaning the HLA allele exclusively associates with a particular HERV allele), in all of these cases the HLA allele occurs on less than 10% of the total haplotypes carrying that HERV allele and is thus unlikely to drive the association of the HERV allele with psoriasis. Highlighted cells indicate instances where an HLA risk allele predominantly lies on a haplotype with a protective HERV allele, or vice versa. In these situations, the HLA allele cannot serve as a confounder for the HERV association. Data is from 256 Caucasian individuals with HERV alleles sequenced and HLA typing performed by sequence-specific oligonucleotide probe (SSOP).

|         | Domain 3                  | Domain 4                        | Domain 5                                                              |
|---------|---------------------------|---------------------------------|-----------------------------------------------------------------------|
|         | 117                       | 155                             | 158                                                                   |
| Peptide | G V I D S D Y N G         | E I Q I V I S T S V P W K A E P | G E C I A Q L L I V P Y V G / R M G K / R V K L N K Q E D / G L E A Q |
| P01     | I V I S T S V P W K A E P |                                 |                                                                       |
| P02     | T S V P W K A E P G E C I |                                 |                                                                       |
| P03     | W K A E P G E C I A Q L L |                                 |                                                                       |
| P04     | P G E C I A Q L L I V P Y |                                 |                                                                       |
| P05-A   | I A Q L L I V P Y V       | G M G                           |                                                                       |
| P05-B   | I A Q L L I V P Y V       | R M G                           |                                                                       |
| P06-A   | L I V P Y V               | G M G K V K L                   |                                                                       |
| P06-B*  | L I V P Y V               | G M G R V K L                   |                                                                       |
| P06-C   | L I V P Y V               | R M G K V K L                   |                                                                       |
| P06-D   | L I V P Y V               | R M G R V K L                   |                                                                       |
| P07-A   | Y V                       | G M G K V K L N K Q E           |                                                                       |
| P07-B*  | Y V                       | G M G R V K L N K Q E           |                                                                       |
| P07-C   | Y V                       | R M G K V K L N K Q E           |                                                                       |
| P07-D   | Y V                       | R M G R V K L N K Q E           |                                                                       |
| P08-A   |                           | G K V K L N K Q E               | D L E A                                                               |
| P08-B*  |                           | G K V K L N K Q E               | G L E A                                                               |
| P08-C*  |                           | G R V K L N K Q E               | D L E A                                                               |
| P08-D*  |                           | G R V K L N K Q E               | G L E A                                                               |
| P09-A   |                           |                                 | L N K Q E D L E A Q                                                   |
| P09-B*  |                           |                                 | L N K Q E G L E A Q                                                   |

**Figure S1. PSORS1 HERV-K dUTPase peptide sequences used for ELISPOT assays.** Boxes indicate the location of dUTPase domains. Amino acid positions are shown above the peptide sequence. Peptides corresponding to psoriasis-risk haplotypes are noted with an asterisk (\*).

|                  | Media  | P01 | P02       | P03 | P04 | P05-<br>A  | P05-<br>B | P06-<br>A | P06-<br>B* | P06-<br>C | P06-<br>D | P07-<br>A | P07-<br>B* | P07-<br>C | P07-<br>D | P08-<br>A | P08-<br>B* | P08-<br>C* | P08-<br>D* | P09-<br>A | P09-<br>B* | CEF        | PHA         |             |
|------------------|--------|-----|-----------|-----|-----|------------|-----------|-----------|------------|-----------|-----------|-----------|------------|-----------|-----------|-----------|------------|------------|------------|-----------|------------|------------|-------------|-------------|
| <b>Psoriasis</b> | PSOR01 | 3   | <b>95</b> | 15  | 20  | <b>295</b> | <b>70</b> | 40        | 40         | <b>50</b> | 35        | <b>60</b> | 45         | 45        | 30        | 35        | 0          | 35         | 0          | <b>50</b> | 0          | <b>100</b> | <b>2865</b> | <b>2810</b> |
|                  | PSOR02 | 0.5 | 5         | 0   | 5   | <b>230</b> | 5         | 10        | 5          | 0         | 0         | 0         | 0          | 0         | 0         | 5         | 0          | 0          | 5          | 10        | 10         | 0          | 20          | <b>960</b>  |
|                  | PSOR03 | 0.5 | 0         | 0   | 0   | <b>80</b>  | 0         | 20        | 5          | 0         | 15        | 0         | 0          | 0         | 0         | 0         | 0          | 5          | 0          | 0         | 0          | 0          | 40          | <b>565</b>  |
|                  | PSOR04 | 0.5 | 0         | 0   | 0   | 0          | 0         | 0         | 0          | 5         | 0         | 0         | 0          | 0         | 0         | 0         | 0          | 0          | 0          | 10        | 0          | 0          | <b>2475</b> | <b>2245</b> |
|                  | PSOR05 | 4   | 0         | 0   | 0   | 0          | 0         | 0         | 0          | 0         | 0         | 0         | 0          | 0         | 0         | 0         | 0          | 0          | 0          | 0         | 0          | 0          | <b>145</b>  | <b>1820</b> |
|                  | PSOR06 | 4   | 0         | 0   | 0   | 20         | 0         | 0         | 10         | 0         | 0         | 0         | 0          | 0         | 0         | 0         | 0          | 0          | 0          | 5         | 0          | 0          | <b>75</b>   | <b>655</b>  |
|                  | PSOR07 | 0   | 20        | 0   | 5   | <b>50</b>  | 5         | 5         | 5          | 10        | 0         | 0         | 10         | 5         | 10        | 5         | 0          | 15         | 10         | 0         | 0          | 5          | 10          | <b>2125</b> |
|                  | PSOR08 | 1   | 0         | 0   | 0   | 35         | 0         | 5         | 5          | 0         | 0         | 0         | 0          | 0         | 0         | 0         | 0          | 0          | 0          | 0         | 0          | 0          | 10          | <b>405</b>  |
|                  | PSOR09 | 1.5 | 15        | 0   | 0   | <b>90</b>  | 0         | 0         | 0          | 0         | 30        | 0         | 0          | 0         | 0         | 0         | 0          | 0          | 0          | 15        | 0          | 0          | <b>100</b>  | <b>1555</b> |
|                  | PSOR10 | 2   | 0         | 0   | 0   | 0          | 0         | 0         | 0          | 0         | 0         | 0         | 0          | 0         | 0         | 0         | 0          | 5          | 0          | 0         | 0          | 0          | 0           | <b>515</b>  |
|                  | PSOR11 | 0.5 | 10        | 0   | 0   | 10         | 5         | 0         | 0          | 5         | 0         | 0         | 20         | 0         | 10        | 15        | 0          | 0          | 0          | 0         | 0          | 10         | 10          | <b>625</b>  |
|                  | PSOR12 | 1   | 0         | 0   | 0   | 0          | 0         | 0         | 0          | 0         | 0         | 0         | 0          | 15        | 0         | 0         | 0          | 0          | 0          | 0         | 0          | 0          | <b>55</b>   | <b>2215</b> |
|                  | PSOR13 | 0.5 | 0         | 0   | 0   | 10         | 5         | 0         | 5          | 0         | 0         | 0         | 0          | 0         | 5         | 0         | 0          | 0          | 0          | 0         | 0          | 0          | 0           | 0           |
| <b>Healthy</b>   | CTRL01 | 3   | 0         | 0   | 0   | 0          | 0         | 0         | 0          | 0         | 0         | 0         | 0          | 0         | 0         | 0         | 0          | 0          | 0          | 0         | 0          | 0          | 40          | <b>1455</b> |
|                  | CTRL02 | 5   | 0         | 0   | 30  | 45         | 10        | 0         | 0          | 0         | 0         | 0         | 0          | 0         | 5         | 0         | 0          | 0          | 25         | 0         | 10         | <b>225</b> | <b>2395</b> |             |
|                  | CTRL03 | 1   | 0         | 15  | 0   | 0          | 10        | 0         | 10         | 0         | 20        | 5         | 0          | 0         | 0         | 0         | 5          | 25         | 0          | 25        | 10         | <b>520</b> | <b>3295</b> |             |
|                  | CTRL04 | 1.5 | 0         | 0   | 0   | 0          | 0         | 0         | 0          | 0         | 0         | 0         | 0          | 0         | 0         | 0         | 0          | 0          | 0          | 0         | 0          | 0          | <b>65</b>   | <b>2125</b> |
|                  | CTRL05 | 0.5 | 5         | 10  | 25  | 35         | 10        | <b>65</b> | 45         | 30        | 30        | 0         | <b>50</b>  | 35        | 0         | 15        | 20         | 5          | 35         | 30        | 10         | 40         | <b>305</b>  | <b>1575</b> |
|                  | CTRL06 | 4   | 0         | 0   | 0   | 0          | 0         | 0         | 0          | 0         | 0         | 0         | 0          | 0         | 0         | 0         | 0          | 0          | 0          | 0         | 0          | 0          | <b>915</b>  | <b>2135</b> |
|                  | CTRL07 | 2.5 | 0         | 0   | 0   | 0          | 0         | 0         | 0          | 0         | 0         | 0         | 0          | 0         | 0         | 0         | 0          | 0          | 0          | 0         | 0          | 0          | <b>660</b>  | <b>3150</b> |
|                  | CTRL08 | 0   | 5         | 15  | 15  | 35         | 5         | 0         | 5          | 5         | 10        | 5         | 5          | 5         | 5         | 5         | 10         | 5          | 0          | 5         | 25         | 10         | <b>1145</b> | <b>1200</b> |
|                  | CTRL09 | 0.5 | 0         | 0   | 0   | 0          | 0         | 0         | 0          | 0         | 5         | 0         | 0          | 15        | 0         | 15        | 0          | 0          | 10         | 0         | 5          | 0          | <b>190</b>  | <b>370</b>  |
|                  | CTRL10 | 2   | 0         | 0   | 0   | 0          | 0         | 0         | 0          | 0         | 0         | 0         | 0          | 0         | 0         | 0         | 0          | 0          | 0          | 0         | 0          | 0          | 0           | <b>310</b>  |
|                  | CTRL11 | 4   | 0         | 0   | 0   | 0          | 0         | 0         | 0          | 0         | 0         | 0         | 0          | 0         | 0         | 10        | 0          | 0          | 10         | 0         | 0          | 0          | <b>315</b>  | <b>2680</b> |

**Table S2. Peripheral blood mononuclear cell reactivity against HERV-K dUTPase peptides using a gamma-interferon ELISPOT assay.** Positive peptide reactivity, shown in highlighted cells, is defined as reaction > 50 SFU/10<sup>6</sup> PBMC. Media without addition of peptide was used as a negative control, while phytohemagglutinin (PHA) and a peptide pool from cytomegalovirus, Epstein-Barr virus, and influenza virus (CEF) were used as positive controls.
